# Supplementary material
Source: publisher figshare collection journal article supplement (https://diabetesjournals.figshare.com/articles/dataset/_/25864279)
Supplement: Supplementary file 2 [file 1]

Genes differentially expressed between HepG2-pCERS2<sup>A</sup> and HepG2-pCERS2<sup>C</sup> cells.

| Ensembl ID                                                  | Gene Symbol    | baseMean | log2 Fold Change | Fold Change |
|-------------------------------------------------------------|----------------|----------|------------------|-------------|
| <b>Up-regulated genes in HepG2-pCERS2<sup>C</sup> cells</b> |                |          |                  |             |
| ENSG00000198938                                             | <i>MT-CO3</i>  | 1039135  | 1.4              | 2.64        |
| ENSG00000198727                                             | <i>MT-CYB</i>  | 1373463  | 1.4              | 2.64        |
| ENSG00000251562                                             | <i>MALAT1</i>  | 32160    | 1.6              | 3.03        |
| ENSG00000198899                                             | <i>MT-ATP6</i> | 1131858  | 1.4              | 2.64        |
| ENSG00000198712                                             | <i>MT-CO2</i>  | 1656862  | 1.4              | 2.64        |
| ENSG00000210195                                             | <i>MT-TT</i>   | 4409     | 1.3              | 2.46        |
| ENSG00000198804                                             | <i>MT-CO1</i>  | 3744276  | 1.4              | 2.64        |
| ENSG00000198888                                             | <i>MT-ND1</i>  | 1339954  | 1.4              | 2.64        |
| ENSG00000211459                                             | <i>MT-RNR1</i> | 256686   | 1.4              | 2.64        |
| ENSG00000198763                                             | <i>MT-ND2</i>  | 1362863  | 1.4              | 2.64        |
| ENSG00000198886                                             | <i>MT-ND4</i>  | 6808994  | 1.4              | 2.64        |
| ENSG00000274422                                             | AC245060.5     | 2602     | 1.6              | 3.03        |
| ENSG00000198695                                             | <i>MT-ND6</i>  | 22916    | 1.2              | 2.30        |
| ENSG00000260296                                             | AC095057.3     | 498      | 1.3              | 2.46        |
| ENSG00000224712                                             | <i>NPIA3</i>   | 1357     | 1.2              | 2.30        |
| ENSG00000212907                                             | <i>MT-ND4L</i> | 349922   | 1.5              | 2.83        |
| ENSG00000228253                                             | <i>MT-ATP8</i> | 53870    | 1.3              | 2.46        |
| ENSG00000198786                                             | <i>MT-ND5</i>  | 2860281  | 1.3              | 2.46        |
| ENSG00000209082                                             | <i>MT-TL1</i>  | 457      | 1.6              | 3.03        |
| ENSG00000255031                                             | AP002807.1     | 238      | 1.4              | 2.64        |
| ENSG00000198840                                             | <i>MT-ND3</i>  | 646401   | 1.4              | 2.64        |
| ENSG00000210100                                             | <i>MT-TI</i>   | 1808     | 1.0              | 2.00        |
| ENSG00000198590                                             | <i>C3orf35</i> | 404      | 1.6              | 3.03        |
| ENSG00000139631                                             | <i>CSAD</i>    | 1068     | 1.2              | 2.30        |
| ENSG00000125735                                             | <i>TNFSF14</i> | 878      | 1.2              | 2.30        |
| ENSG00000198467                                             | <i>TPM2</i>    | 2793     | 1.4              | 2.64        |
| ENSG00000210154                                             | <i>MT-TD</i>   | 459      | 1.3              | 2.46        |
| ENSG00000226742                                             | <i>HSBP1L1</i> | 580      | 1.1              | 2.14        |

|                 |                  |         |     |      |
|-----------------|------------------|---------|-----|------|
| ENSG00000255823 | <i>MTRNR2L8</i>  | 2475    | 1.3 | 2.46 |
| ENSG00000212694 | <i>LINC01089</i> | 248     | 1.3 | 2.46 |
| ENSG00000269821 | <i>KCNQ1OT1</i>  | 3881    | 1.1 | 2.14 |
| ENSG00000210082 | <i>MT-RNR2</i>   | 6597104 | 1.2 | 2.30 |
| ENSG00000186166 | <i>CCDC84</i>    | 1606    | 1.0 | 2.00 |
| ENSG00000269028 | <i>MTRNR2L2</i>  | 924     | 1.3 | 2.46 |
| ENSG00000204305 | <i>AGER</i>      | 352     | 1.2 | 2.30 |
| ENSG00000180815 | <i>MAP3K15</i>   | 269     | 1.2 | 2.30 |
| ENSG00000167524 | <i>RSKR</i>      | 272     | 1.0 | 2.00 |
| ENSG00000164879 | <i>CA3</i>       | 232     | 1.3 | 2.46 |

---

**Down-regulated genes in HepG2-pCERS2<sup>C</sup> cells**

---

|                 |                 |      |      |       |
|-----------------|-----------------|------|------|-------|
| ENSG00000079739 | <i>PGM1</i>     | 309  | -1.5 | -2.83 |
| ENSG00000198830 | <i>HMGN2</i>    | 1111 | -1.1 | -2.14 |
| ENSG00000099937 | <i>SERPIND1</i> | 3756 | -1.2 | -2.30 |
| ENSG00000111786 | <i>SRSF9</i>    | 689  | -1.0 | -2.00 |
| ENSG00000100473 | <i>COCH</i>     | 251  | -1.3 | -2.46 |
| ENSG00000135452 | <i>TSPAN31</i>  | 247  | -1.1 | -2.14 |
| ENSG00000164258 | <i>NDUFS4</i>   | 288  | -1.1 | -2.14 |
| ENSG00000135926 | <i>TMBIM1</i>   | 998  | -1.1 | -2.14 |
| ENSG00000135624 | <i>CCT7</i>     | 1584 | -1.1 | -2.14 |
| ENSG00000158019 | <i>BABAM2</i>   | 340  | -1.0 | -2.00 |

---

| $P$     | $P_{\text{FDR}}$ |
|---------|------------------|
| 2.1E-11 | 1.3E-07          |
| 3.0E-11 | 1.3E-07          |
| 5.6E-09 | 9.4E-06          |
| 8.7E-09 | 1.2E-05          |
| 1.9E-08 | 2.0E-05          |
| 6.0E-08 | 5.7E-05          |
| 6.8E-08 | 5.8E-05          |
| 3.8E-07 | 3.0E-04          |
| 4.0E-06 | 2.6E-03          |
| 4.8E-06 | 2.7E-03          |
| 6.2E-06 | 3.3E-03          |
| 1.9E-05 | 9.6E-03          |
| 8.6E-05 | 0.04             |
| 1.0E-04 | 0.04             |
| 1.2E-04 | 0.05             |
| 1.4E-04 | 0.05             |
| 1.7E-04 | 0.06             |
| 2.0E-04 | 0.07             |
| 2.5E-04 | 0.08             |
| 2.7E-04 | 0.08             |
| 3.7E-04 | 0.11             |
| 4.1E-04 | 0.12             |
| 5.0E-04 | 0.14             |
| 8.5E-04 | 0.22             |
| 8.8E-04 | 0.22             |
| 1.0E-03 | 0.24             |
| 1.7E-03 | 0.36             |
| 2.3E-03 | 0.46             |

|         |      |
|---------|------|
| 2.4E-03 | 0.47 |
| 2.5E-03 | 0.47 |
| 2.9E-03 | 0.54 |
| 3.5E-03 | 0.56 |
| 3.6E-03 | 0.56 |
| 3.7E-03 | 0.56 |
| 4.2E-03 | 0.58 |
| 6.3E-03 | 0.78 |
| 7.6E-03 | 0.84 |
| 8.6E-03 | 0.86 |

---



---

|         |      |
|---------|------|
| 1.3E-03 | 0.29 |
| 2.5E-03 | 0.47 |
| 3.8E-03 | 0.56 |
| 3.9E-03 | 0.56 |
| 6.6E-03 | 0.80 |
| 7.1E-03 | 0.83 |
| 7.9E-03 | 0.84 |
| 8.0E-03 | 0.84 |
| 8.3E-03 | 0.85 |
| 9.2E-03 | 0.86 |

---
